# Supplementary material for: Smart joints: auto-cleaning mechanism in the legs of beetles
Source: PubMed Central journal article supplement (PMC9519561; doi:10.1038/s42003-022-03924-6), 2022-09-28
Supplement: 42003_2022_3924_MOESM2_ESM.pdf [file 42003_2022_3924_MOESM2_ESM.pdf]

## Supplementary information

To the paper: Nadein, K. & Gorb, S. 2022. Smart joints: auto-cleaning mechanism in the legs of beetles.  
*Communications Biology*.

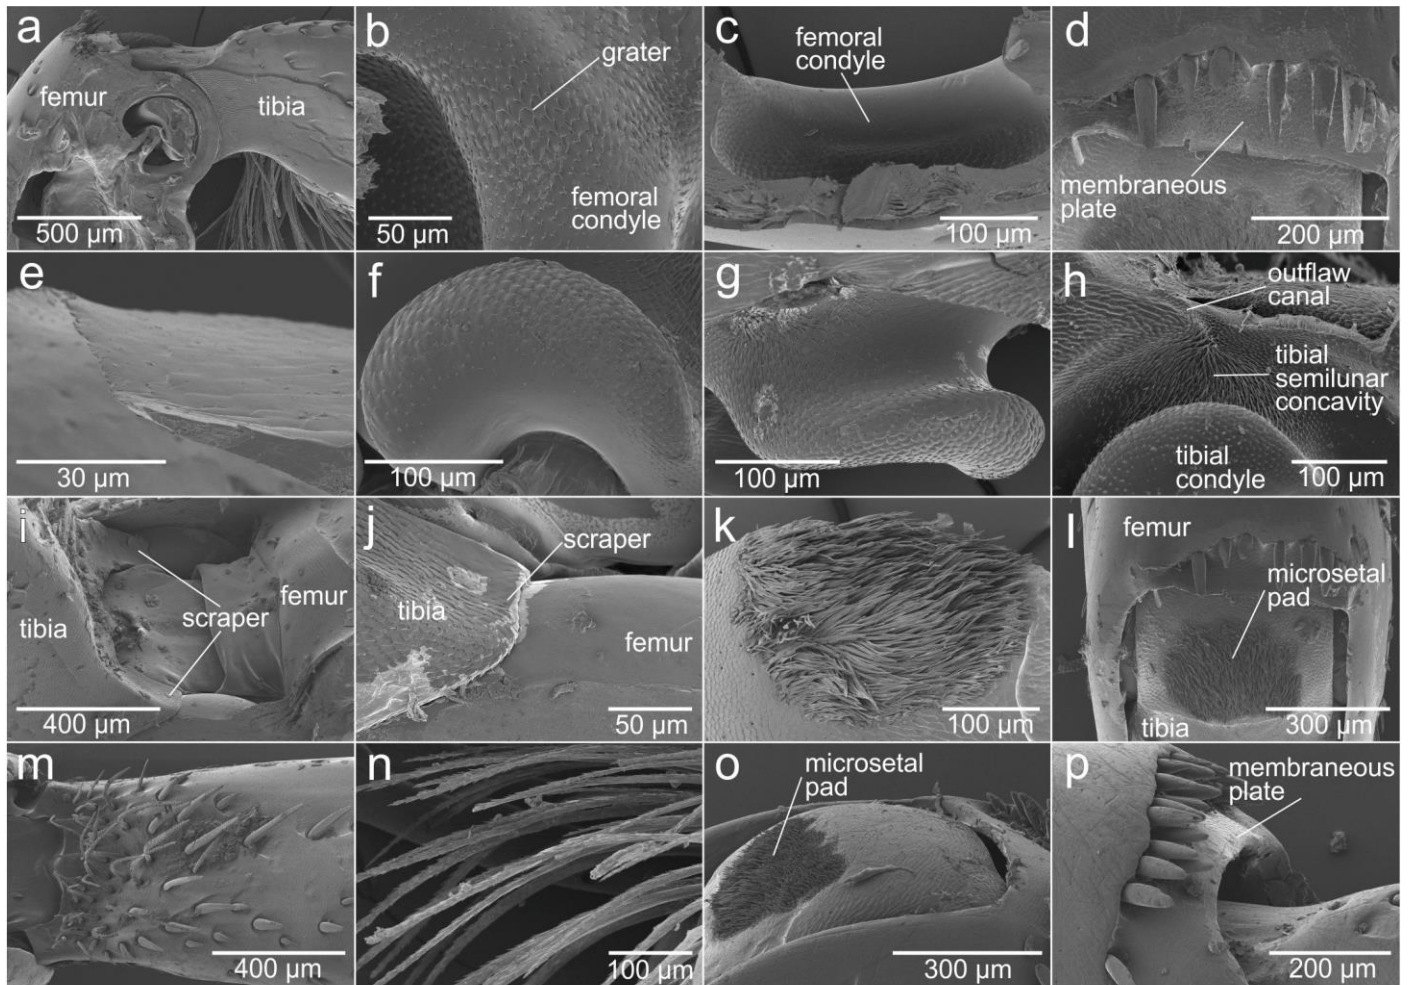

Fig. S1. *Pachnoda marginata*, structure of the femoro-tibial joint, SEM micrographs. a, femoro-tibial joint, parasagittal section, lateral femoral wall is removed; b, grater; c, internal surface of the femoral condyle; d, membranous plate, dorsal view; e, membranous plate edge, lateral view; f, tibial condyle, dorsal view; g, tibial condyle, surface contacting femoral condyle; h, surface of the tibial semilunar concavity; i, ventral surface of the femoro-tibial joint; j, scraper, dorso-lateral view; k, microsetal pad, anterolateral view; l, microsetal pad, dorsal view; n, hairy brush, ventral view; m, hairs of hairy brush; o, femoro-tibial joint with flexed tibia, dorsal surface, anterolateral view; p, femoro-tibial joint with extended tibia, dorsal surface, anterolateral view.

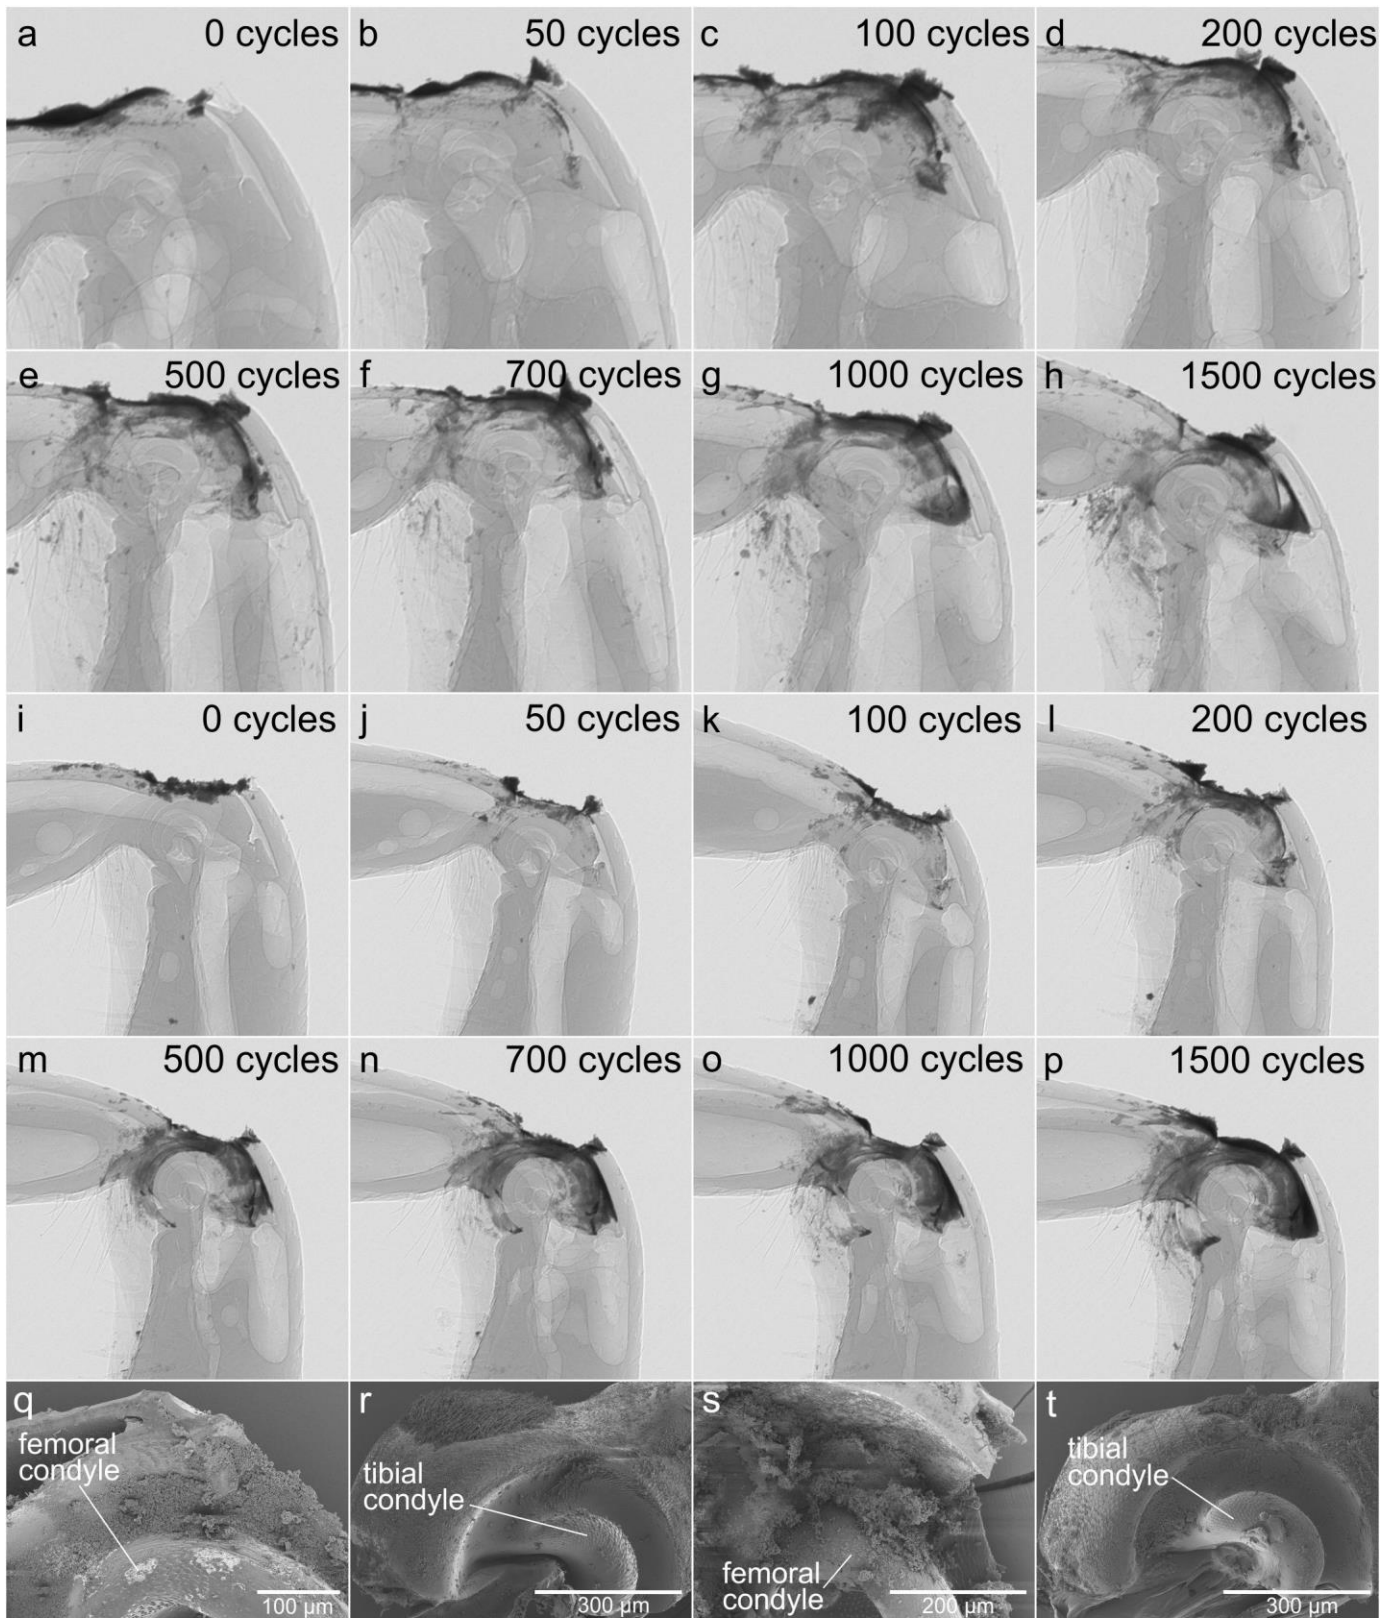

Fig. S2. Experimental results, *Pachnoda marginata*. Contamination of microsetal pad with 1-3  $\mu\text{m}$  metallic particles; a-p, micro-CT; q-t, SEM micrographs; a-h, native state; i-p, microsetal pad and membrane removed. q, femur, sagittal section, native state; r, tibia, lateral view, native state; s, femur, sagittal section, microsetal pad and membrane removed; t, tibia, lateral view, microsetal pad and membrane removed.

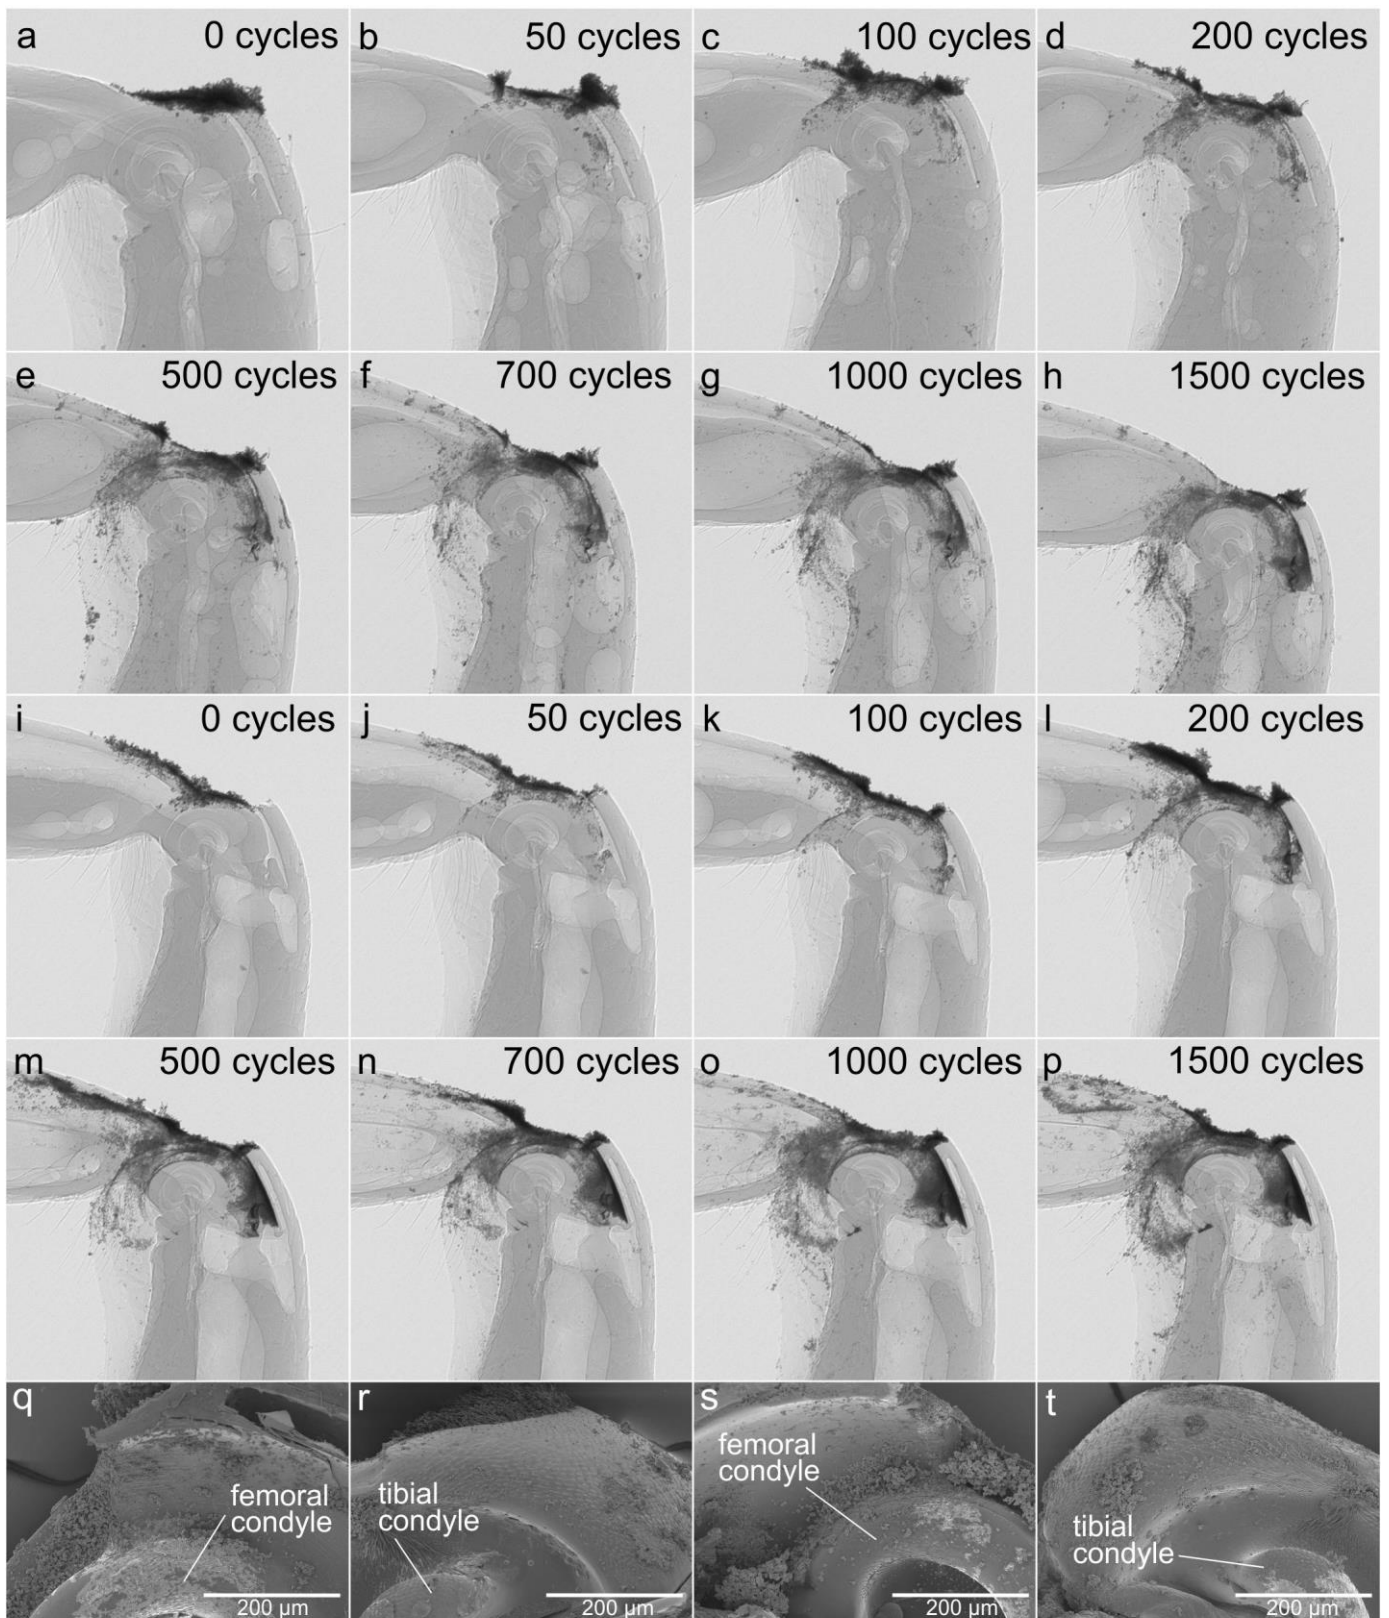

Fig. S3. Experimental results, *Pachnoda marginata*. Contamination of microsetal pad with 2-5  $\mu\text{m}$  metallic particles; a-p, micro-CT; q-t, SEM micrographs; a-h, native state; i-p, microsetal pad and membrane plate removed. q, femur, sagittal section, native state; r, tibia, lateral view, native state; s, femur, sagittal section, microsetal pad and membrane plate removed; t, tibia, lateral view, microsetal pad and membrane plate removed.



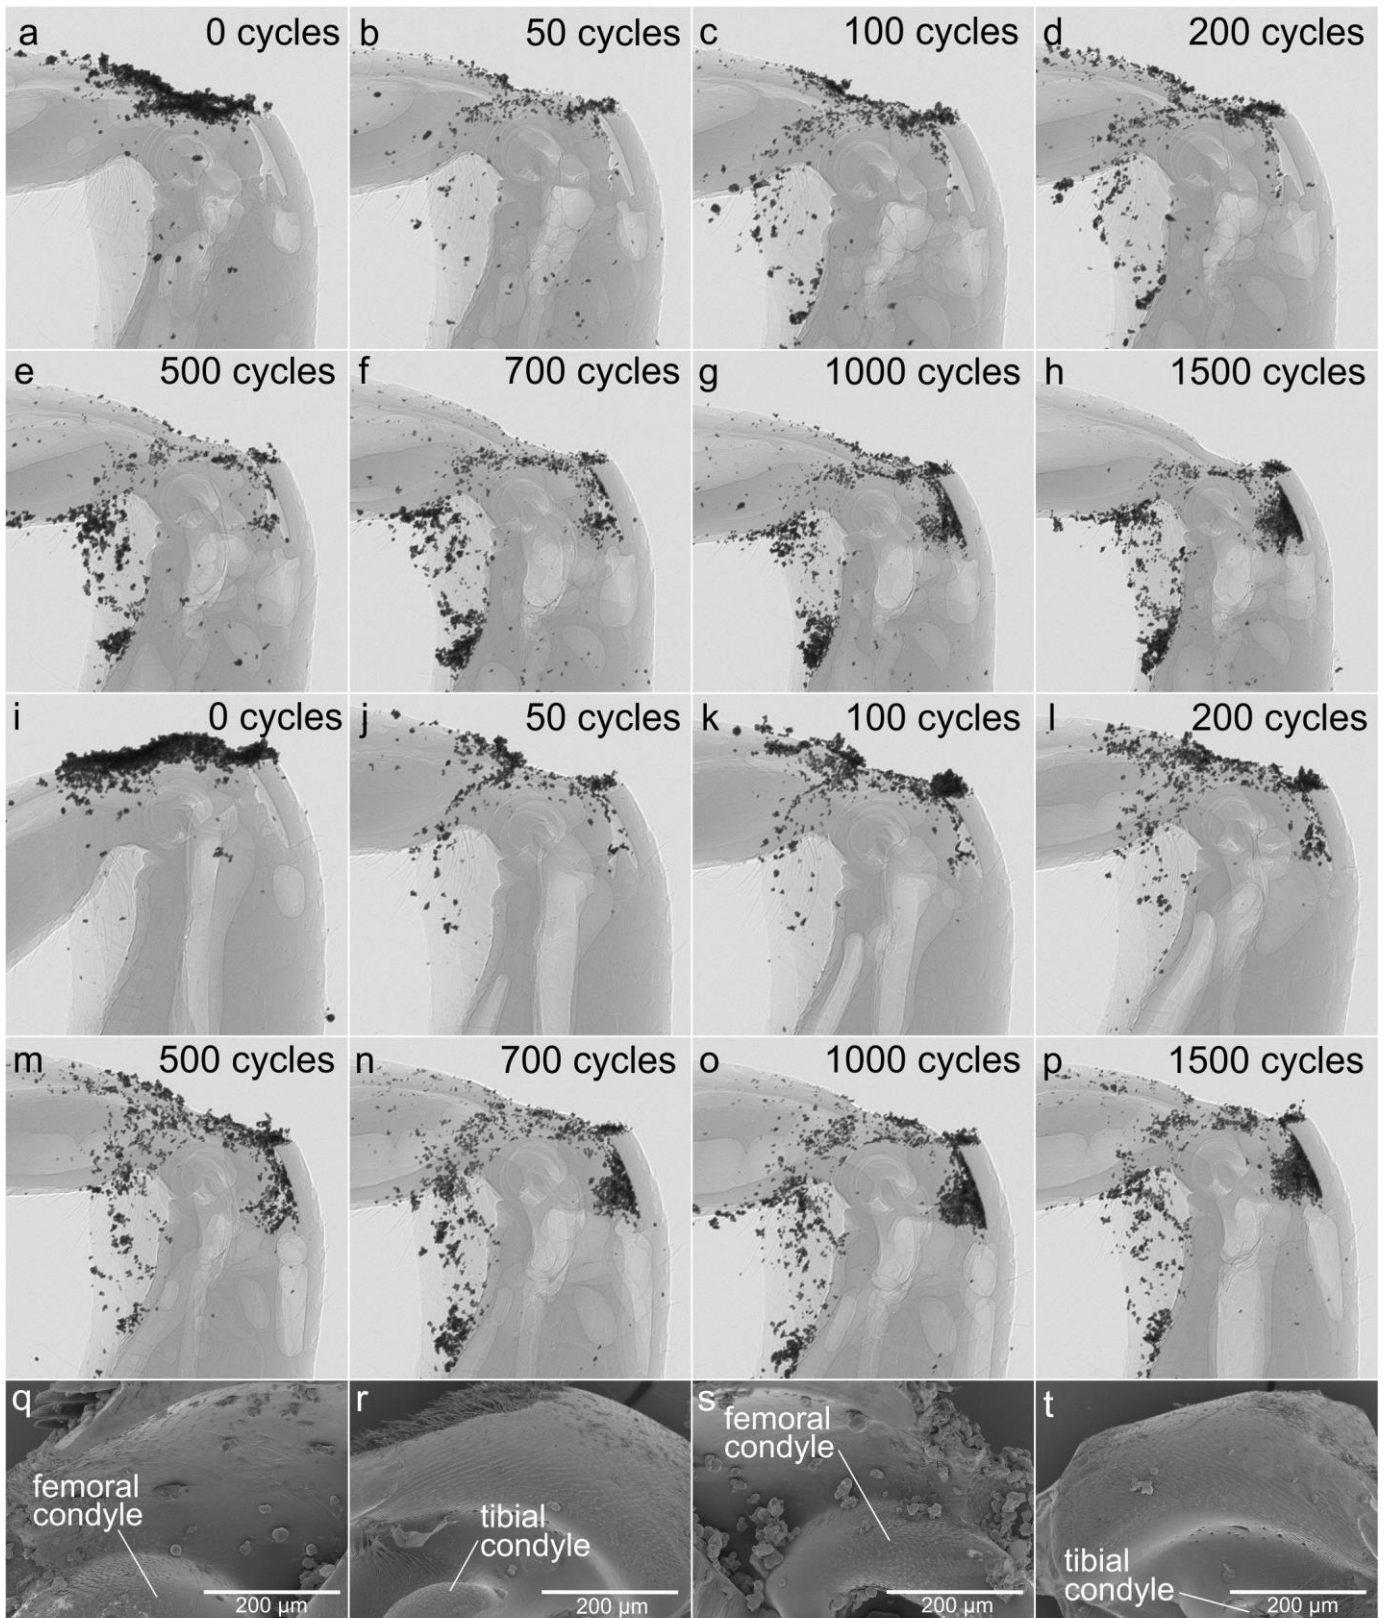

Fig. S4. Experimental results, *Pachnoda marginata*. Contamination of microsetal pad with 20-50  $\mu\text{m}$  metallic particles; a-p, micro-CT; q-t, SEM micrographs; a-h, native state; i-p, microsetal pad and membrane removed. q, femur, sagittal section, native state; r, tibia, lateral view, native state; s, femur, sagittal section, microsetal pad and membrane removed; t, tibia, lateral view, microsetal pad and membrane removed.



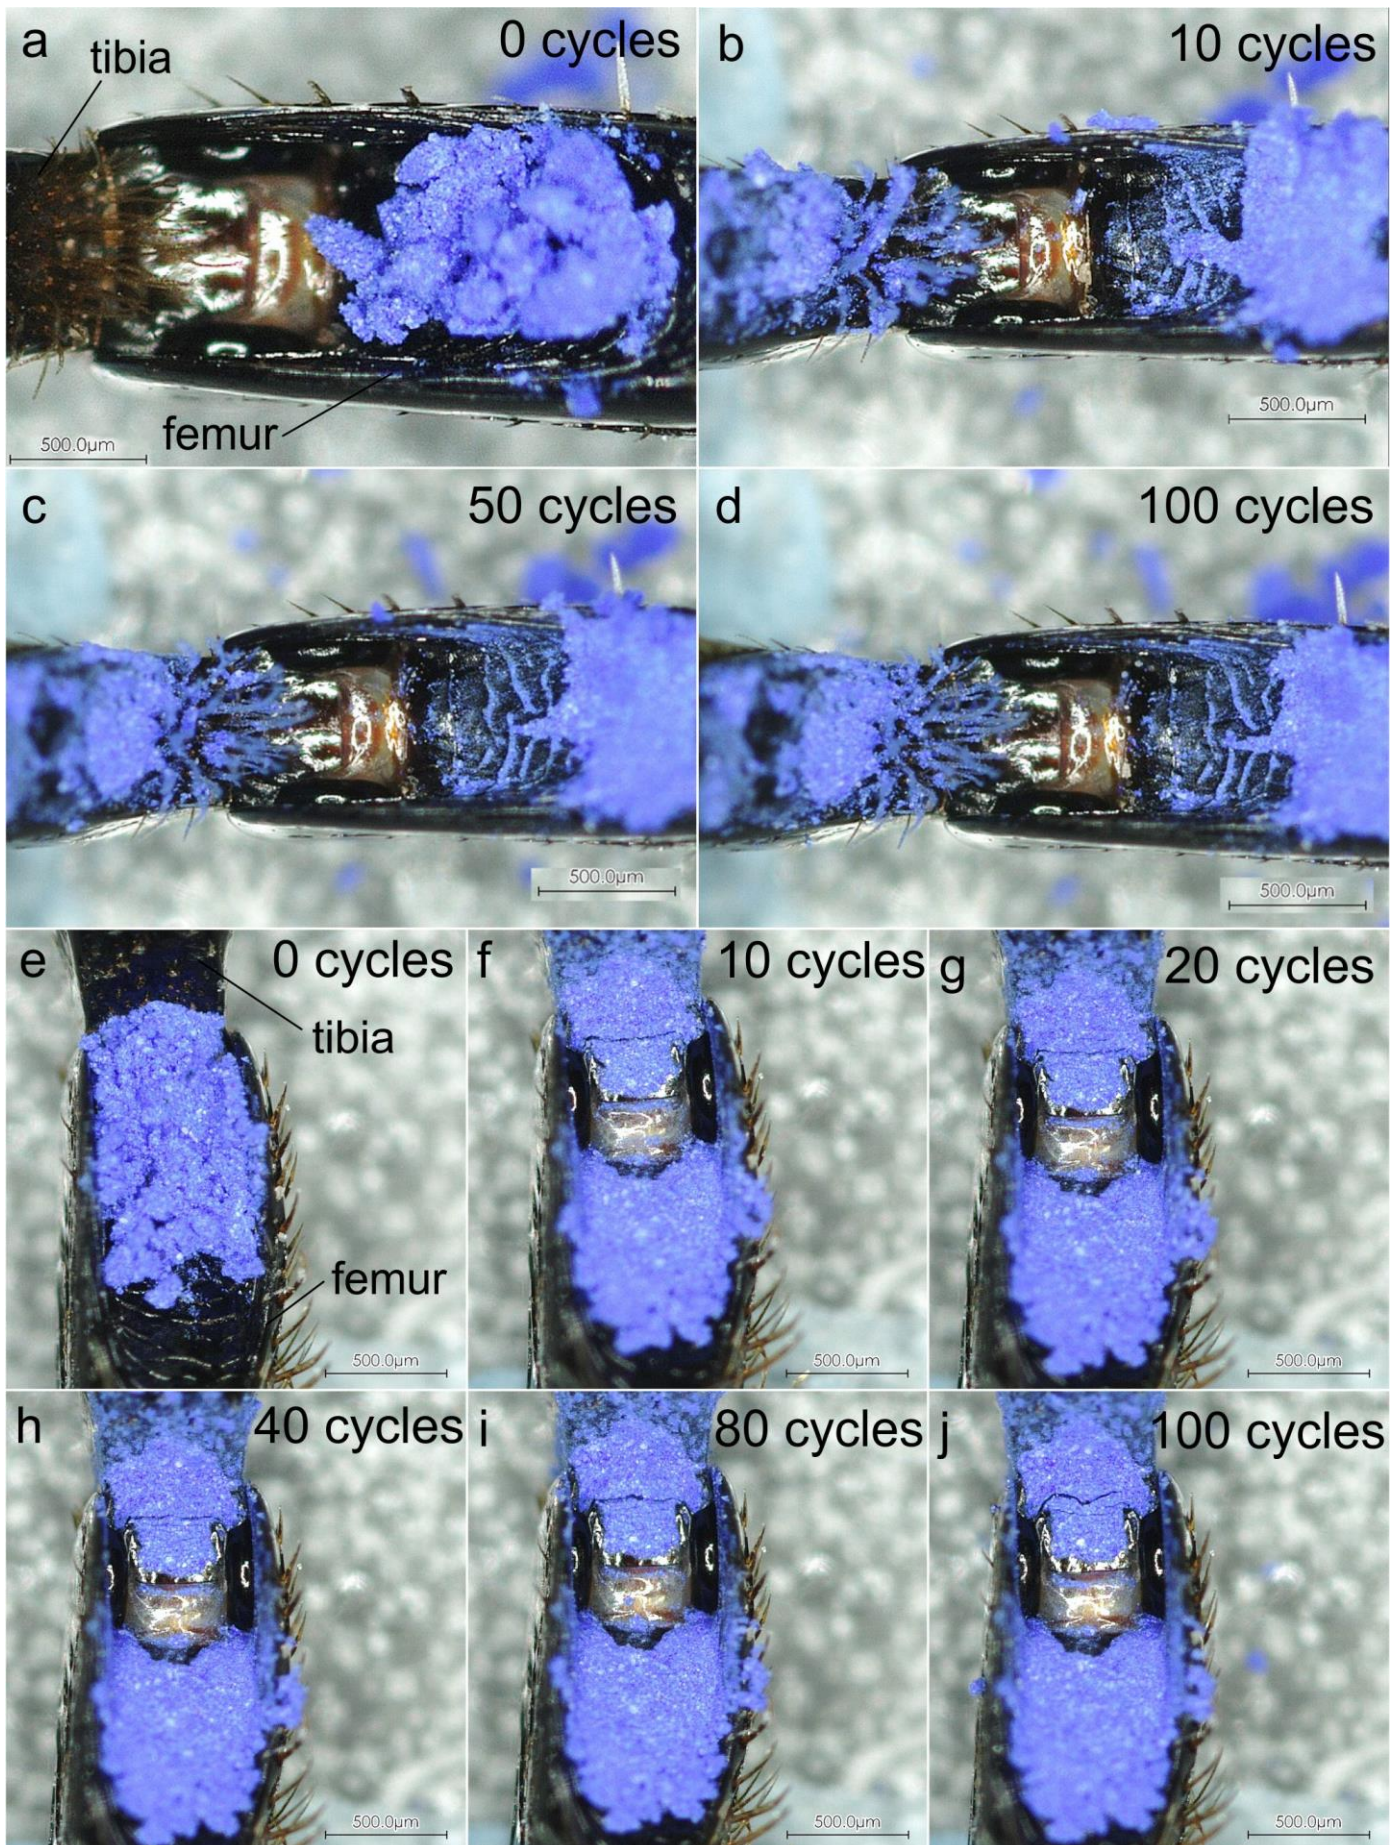

Fig. S5. Experimental results, *Pachnoda marginata*. Contamination of the ventral side of the femoro-tibial joint by iron oxide powder (blue coloured). a-d, experiment with the hairy pad; e-j, experiment with the scraper. Scale bar: a-j, 500  $\mu\text{m}$ .



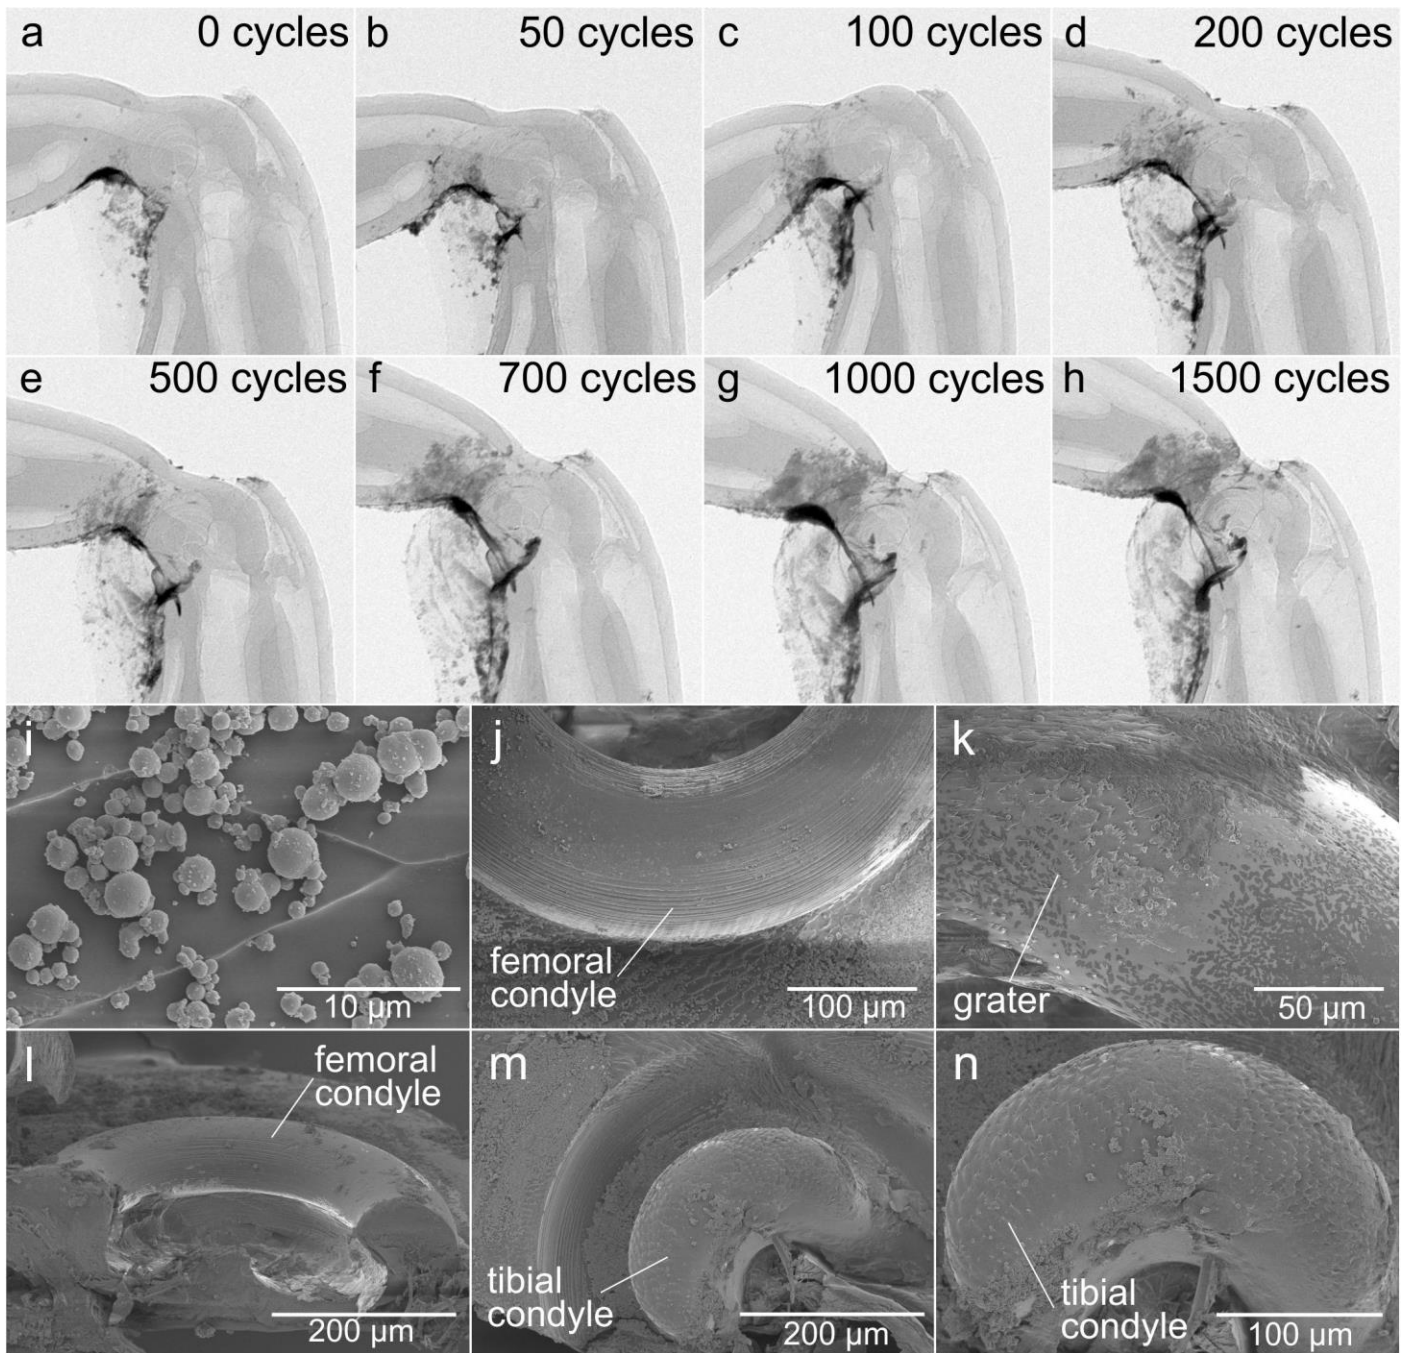

Fig. S6. Experimental results, *Pachnoda marginata*. Contamination of internal joint cavity with 1-3  $\mu\text{m}$  metallic particles; a-h, micro-CT, i-n; SEM micrographs; i, iron particles; j, femoral condyle; k, grater on the femoral condyle; l, internal surface of the femoral condyle; m, tibial counterpart of the femoro-tibial joint; n, tibial condyle.

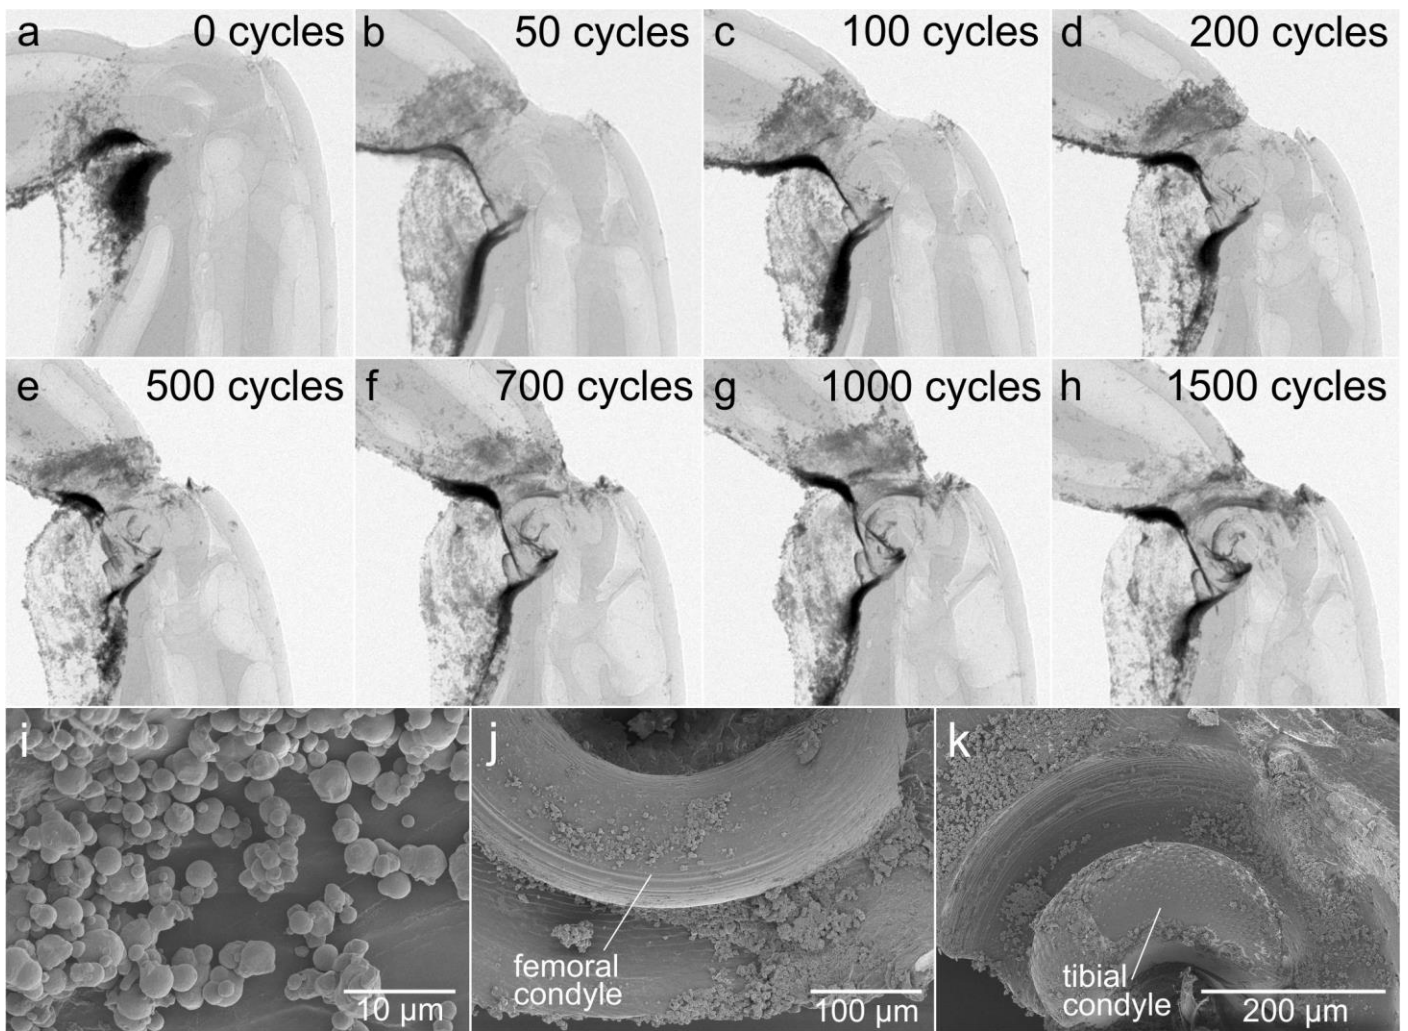

Fig. S7. Experimental results, *Pachnoda marginata*. Contamination of internal joint cavity with 2-5  $\mu\text{m}$  metallic particles; a-h, micro-CT; i-k, SEM micrographs; i, iron particles; j, femoral condyle; k, tibial counterpart of the femoro-tibial joint.

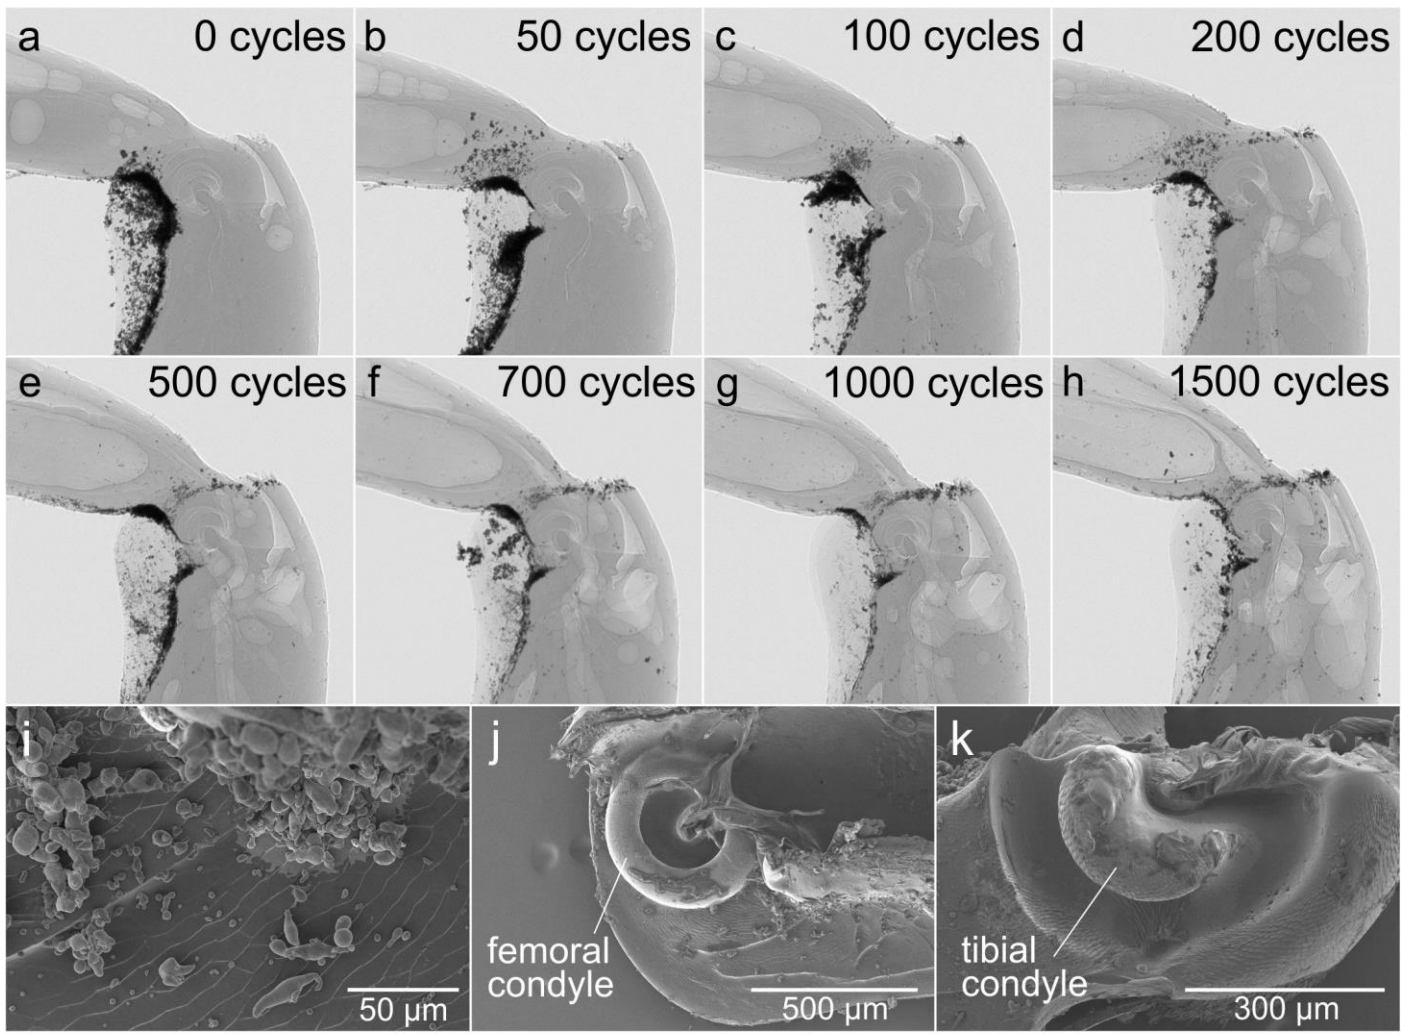

Fig. S8. Experimental results, *Pachnoda marginata*. Contamination of internal joint cavity with 10-30  $\mu\text{m}$  metallic particles; a-h, micro-CT; i-k, SEM micrographs; i, iron particles; j, femoral counterpart of the femoro-tibial joint, sagittal section; k, tibial counterpart of the femoro-tibial joint.



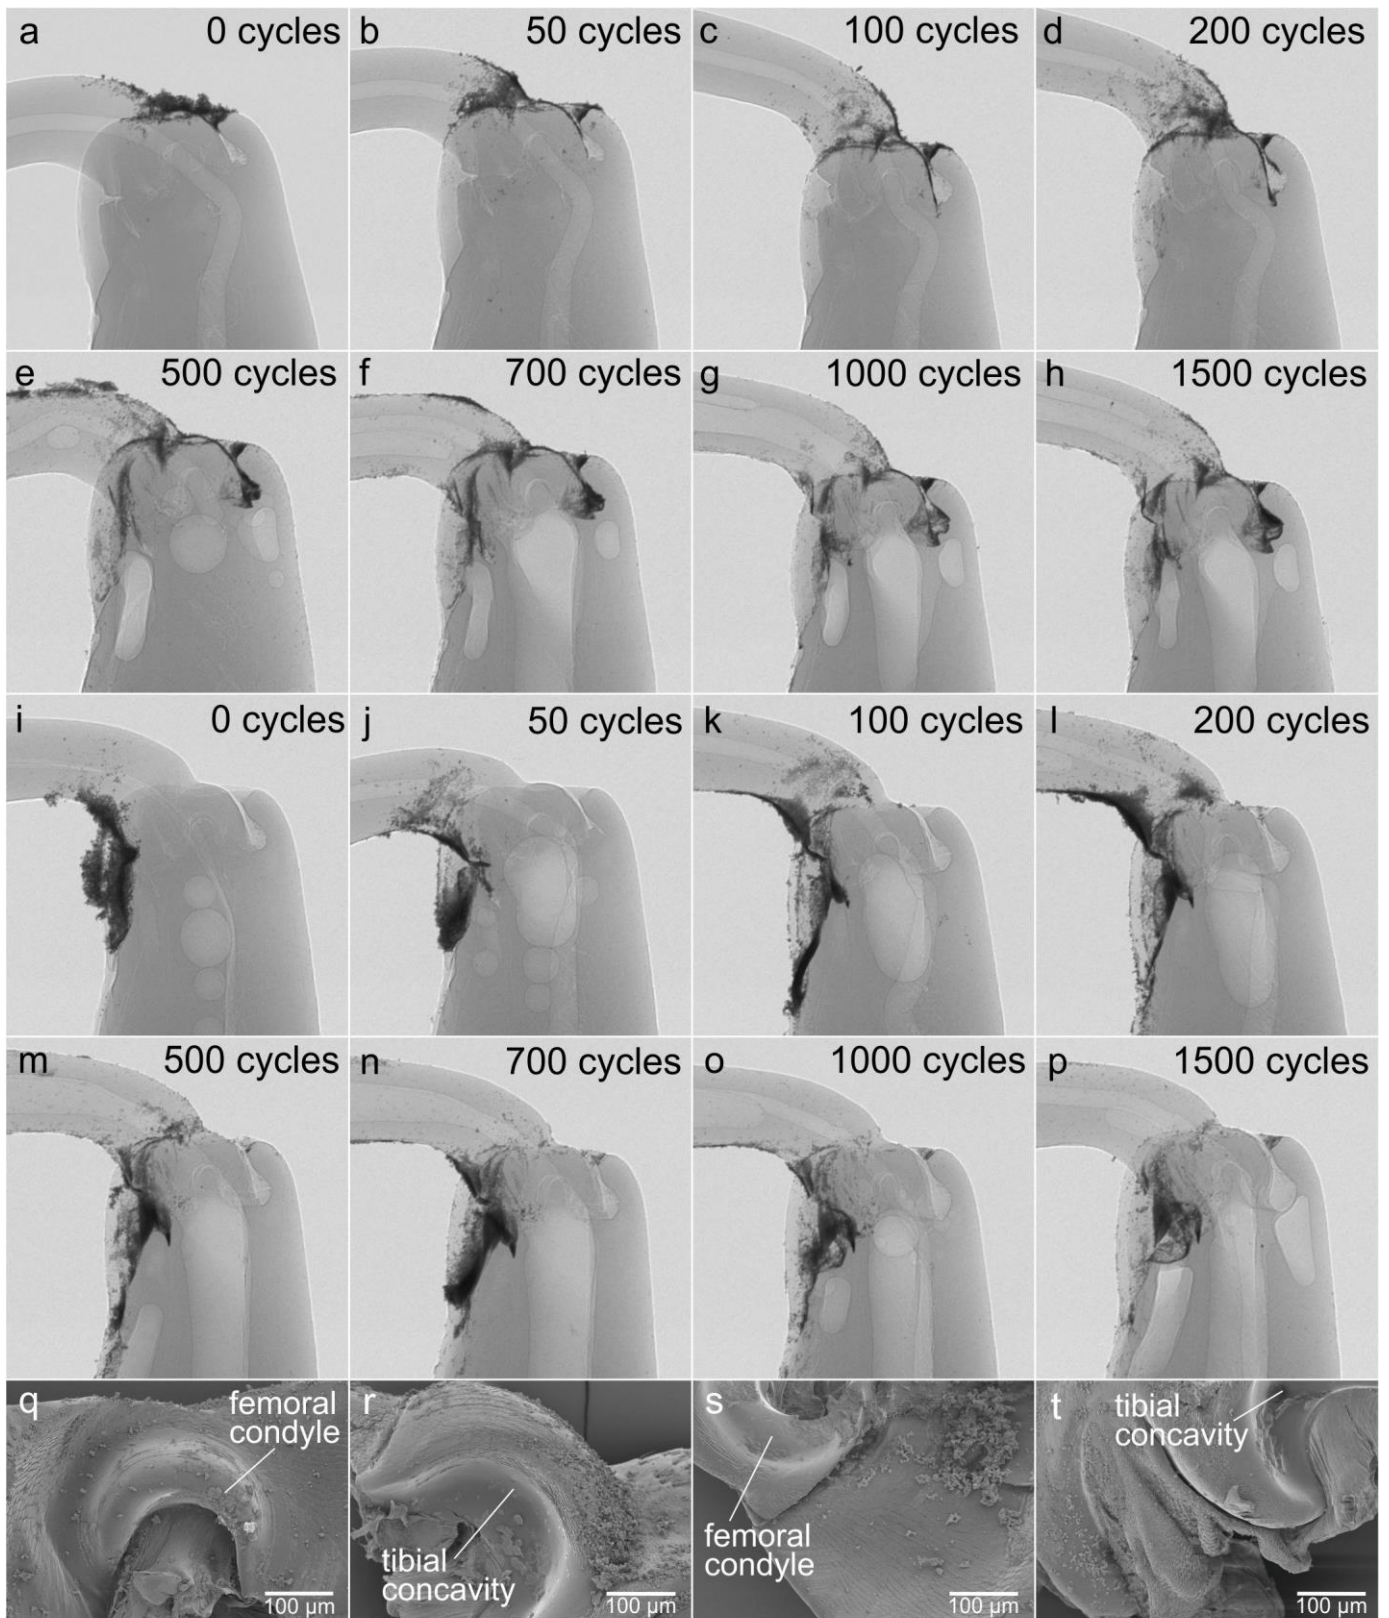

Fig. S9. Experimental results, *Zophobas morio*. Contamination of joint cavity with 2-5 μm metallic particles; a-h, q, r, contamination through the dorsal gap; i-p, s, t, contamination through the ventral gap; a-p, micro-CT; q-t, SEM micrographs; q, femur, sagittal section; r, tibia, lateral view, s, femur, sagittal section, t, tibia, lateral view.

Table S1. Results of testing the effectiveness of microsetal pad/membraneous plate cleaning by contamination with metal particles of different sizes (1-3  $\mu\text{m}$ , 2-5  $\mu\text{m}$ , 20-50  $\mu\text{m}$ ). The data are presented as the projected areas ( $\text{mm}^2$ ) occupied by the particles (see section Material and methods).

| Cycles | Erased, area ( $\text{mm}^2$ ) |                   |                     | Native, area ( $\text{mm}^2$ ) |                   |                     |
|--------|--------------------------------|-------------------|---------------------|--------------------------------|-------------------|---------------------|
|        | 1-3 $\mu\text{m}$              | 2-5 $\mu\text{m}$ | 20-50 $\mu\text{m}$ | 1-3 $\mu\text{m}$              | 2-5 $\mu\text{m}$ | 20-50 $\mu\text{m}$ |
| 50     | 0.064                          | 0.063             | 0.044               | 0.036                          | 0.060             | 0.031               |
| 100    | 0.097                          | 0.103             | 0.073               | 0.087                          | 0.086             | 0.044               |
| 200    | 0.127                          | 0.166             | 0.080               | 0.090                          | 0.121             | 0.049               |
| 500    | 0.248                          | 0.190             | 0.087               | 0.102                          | 0.153             | 0.054               |
| 700    | 0.285                          | 0.206             | 0.091               | 0.125                          | 0.178             | 0.061               |
| 1000   | 0.292                          | 0.233             | 0.100               | 0.163                          | 0.200             | 0.082               |
| 1500   | 0.368                          | 0.259             | 0.108               | 0.207                          | 0.215             | 0.090               |
